# Supplementary material for: Extraction of Tropical Fruit Peels and Development of HPMC Film Containing the Extracts as an Active Antibacterial Packaging Material
Source: MDPI journal article supplement (doi:10.3390/molecules26082265), 2021-04-14
Supplement: s1 [file s1]

## Supplementary data

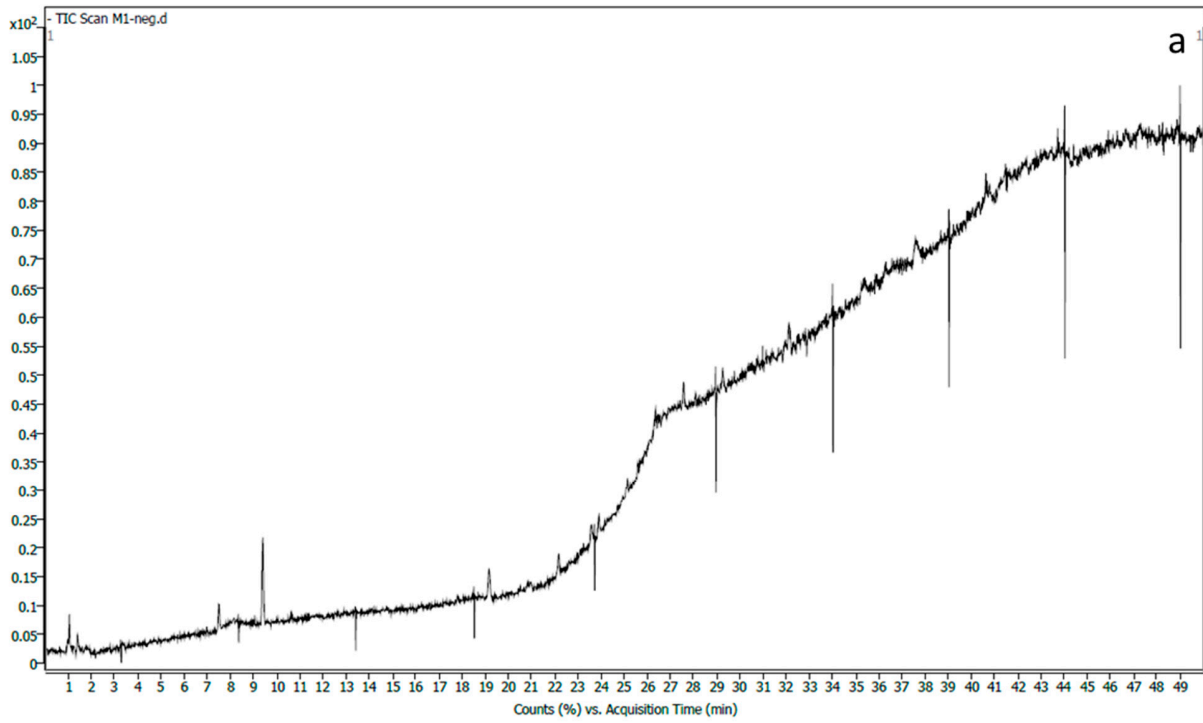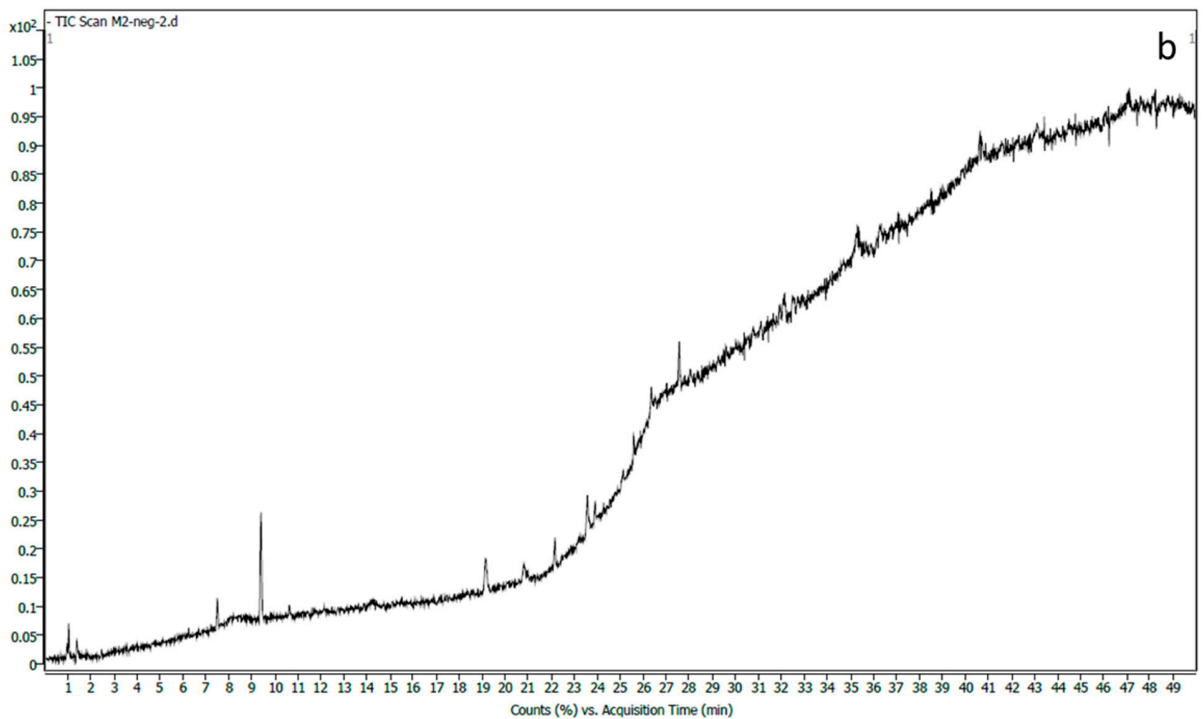

**Figure S1.** Full LC-MS chromatograms of MT-MAE-W/E (a) and MT-Ma-W/E (b) in negative ion mode of analysis.

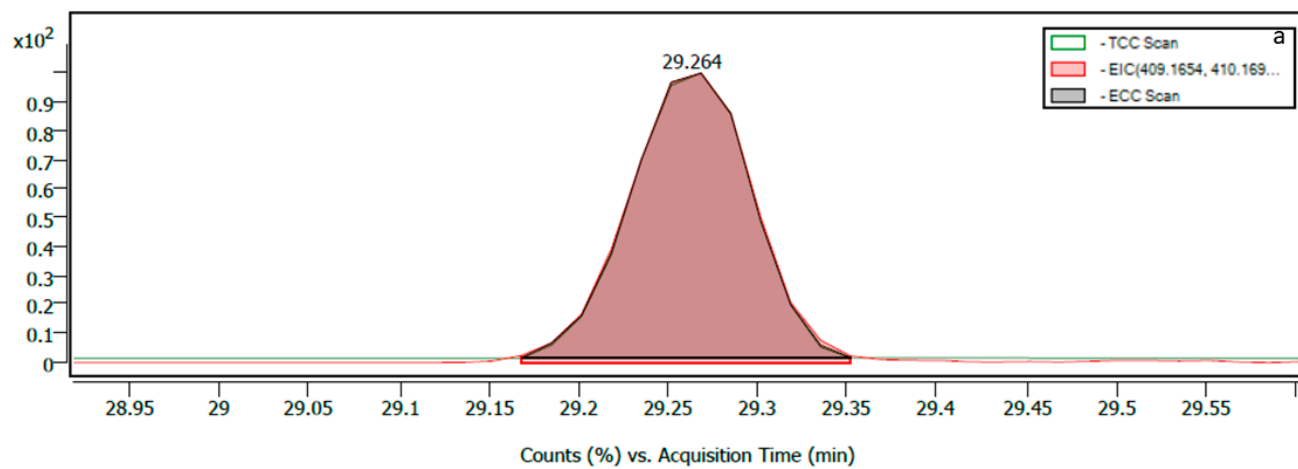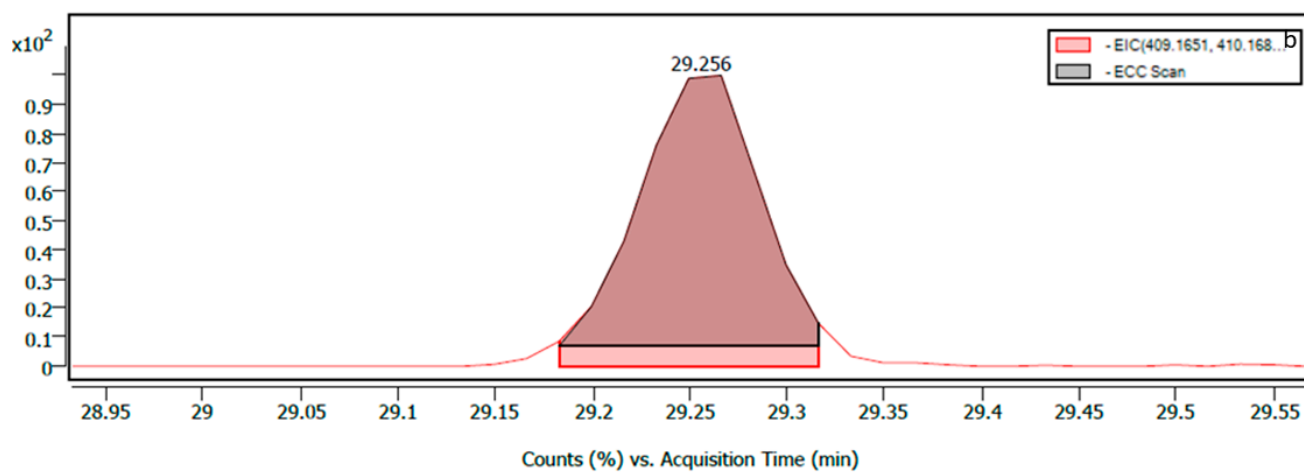

**Figure S2.** LC-MS chromatograms resending  $\alpha$ -mangostin of MT-MAE-W/E (a) and MT-Ma-W/E (b).
